# Supplementary material for: Improving acute eye consultations in general practice: a practical approach
Source: PubMed Central journal article supplement — BMJ Qual Improv Rep. 2014 Dec 10;3(1):u206617.w2852. doi: 10.1136/bmjquality.u206617.w2852 (PMC4645888; doi:10.1136/bmjquality.u206617.w2852), 2014-12-10
Supplement: bmjqir-3-u206617-w2852-s1.pdf [file bmjqir-3-u206617-w2852-s1.pdf]

# Cycle 1 Results

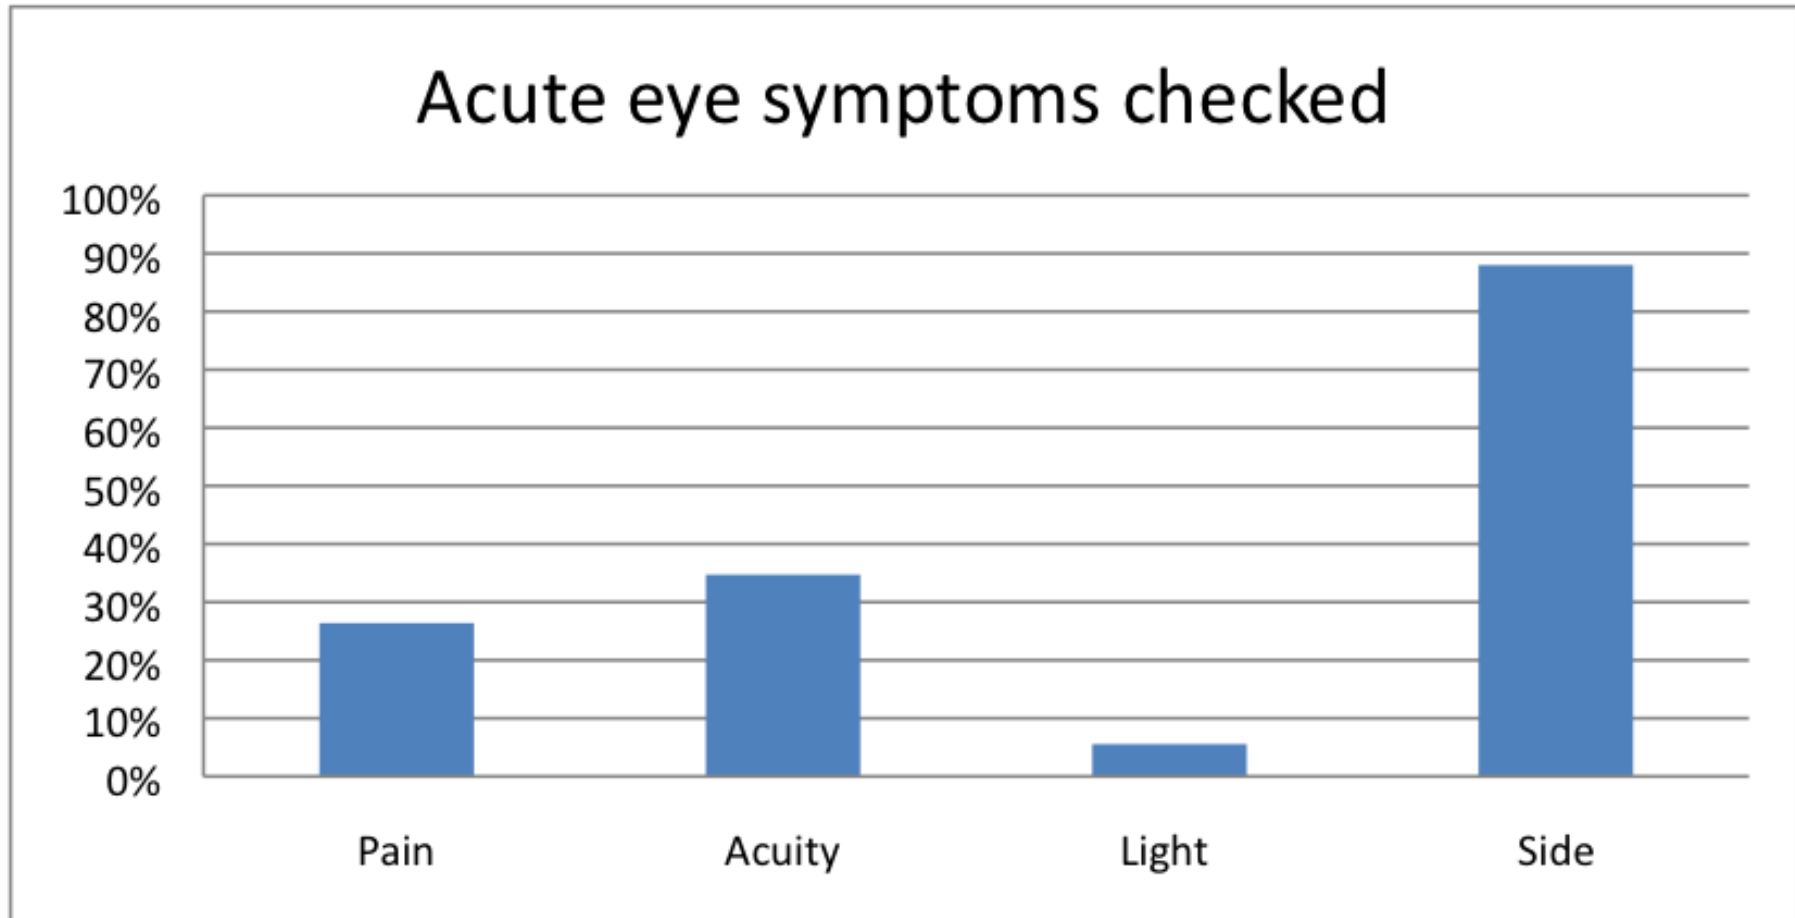

Figure 1

## Cycle 1 numerical results

| Clinical finding        | Compliance |     |
|-------------------------|------------|-----|
|                         | N=144      | (%) |
| Pain                    | 38         | 26% |
| Visual Acuity           | 50         | 35% |
| Photophobia             | 8          | 6%  |
| Unilateral or Bilateral | 126        | 88% |

*Figure 2*

## Cycle 1 vs Cycle 2 results

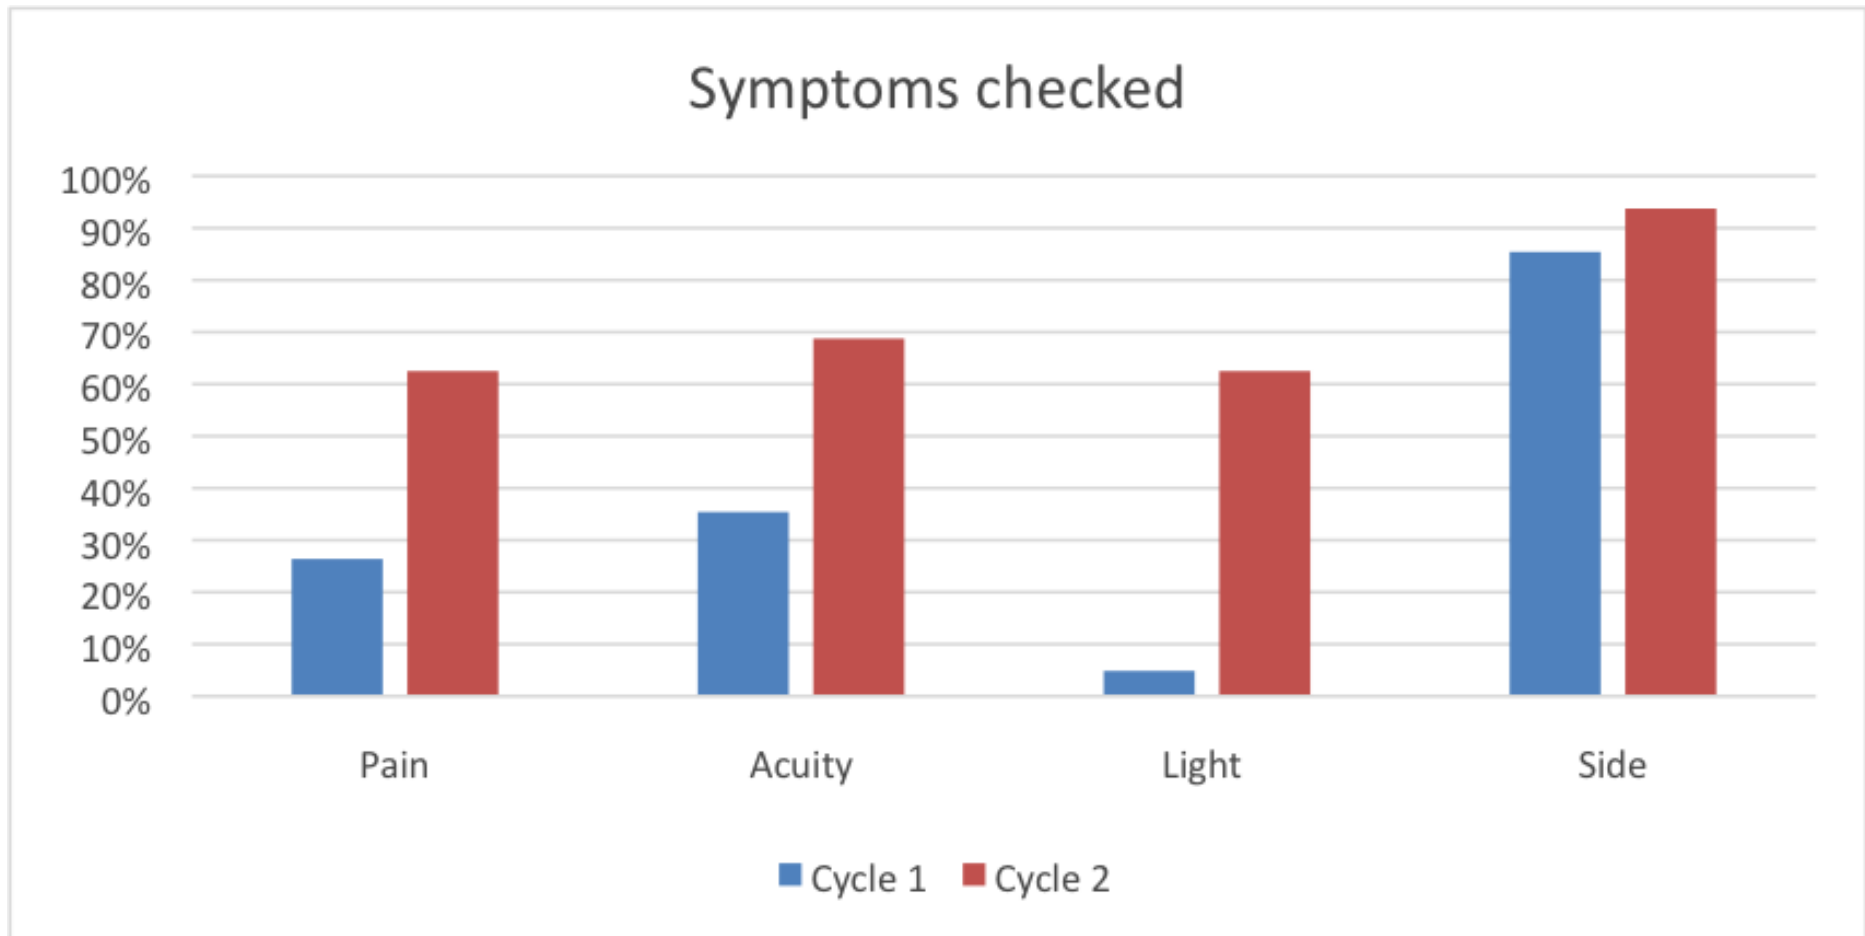

Figure 3

**Run-chart  
cycles**

**over two audit**

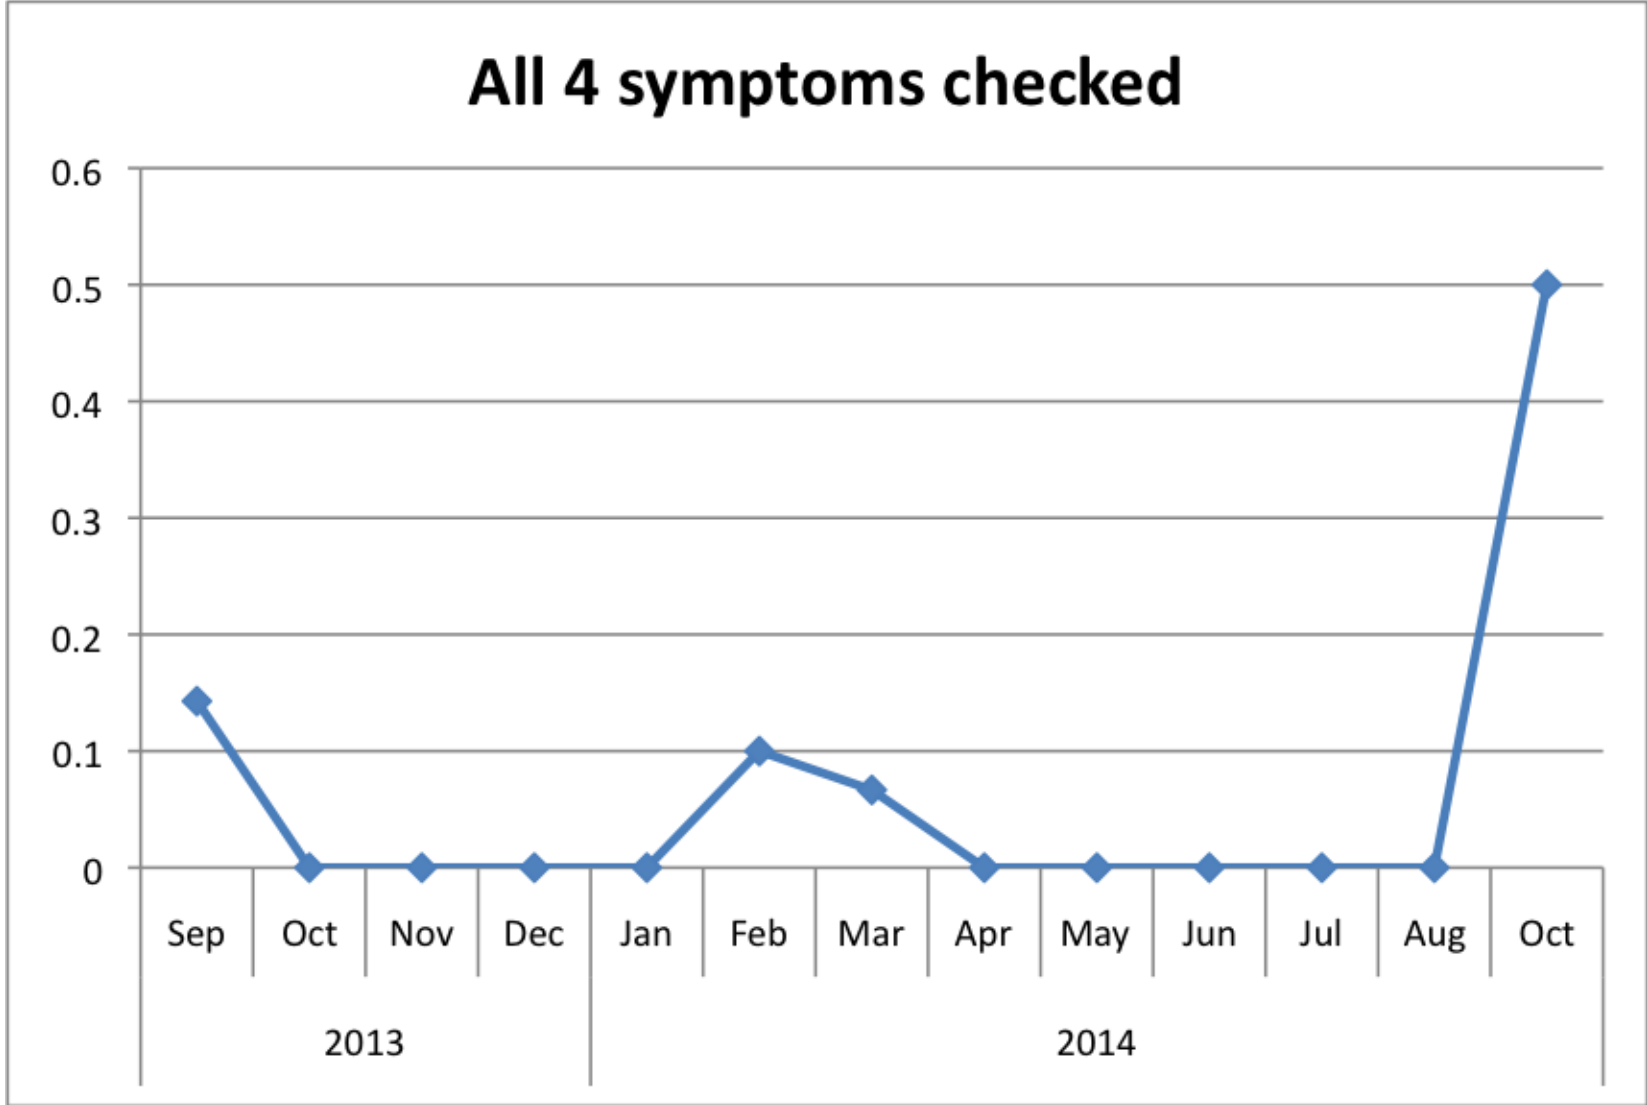

Figure 4

# Eye Examination Kit

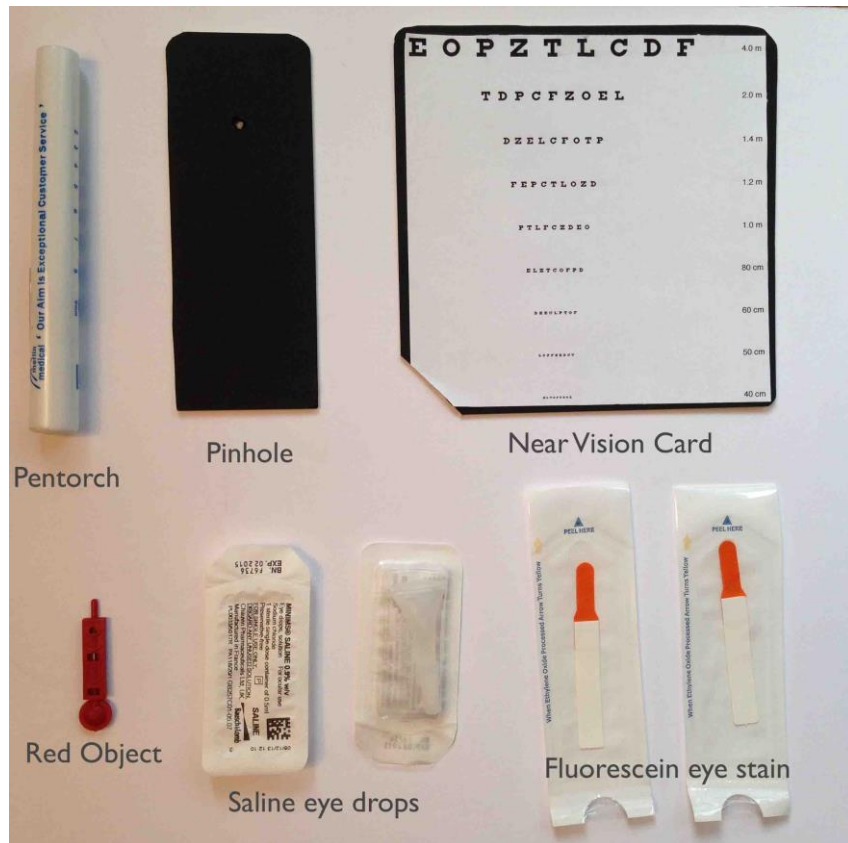

Figure 5a

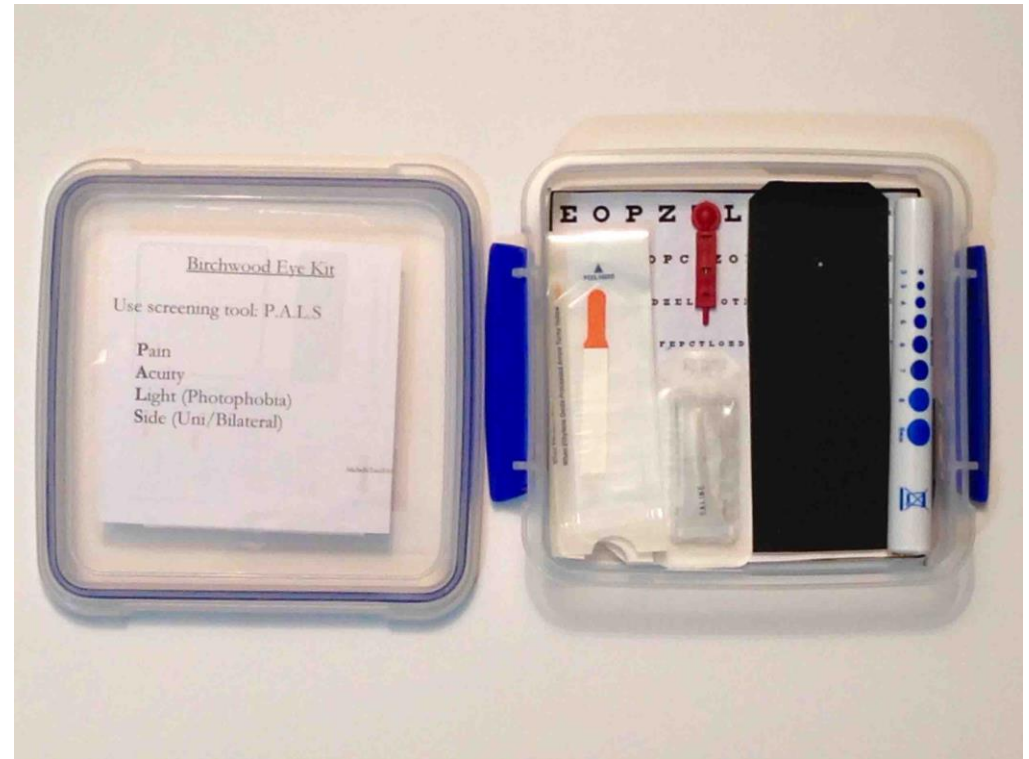

Figure 5b

**Red**

**Eye**

# Template

Acute Eye/Ophthalmology Consultation Template

Acute Eye Symptoms | Eye Examinations | Eye examinations continued

## Acute Red Eye / Ophthalmology consultations

P.A.L.S Symptoms screen: Does your patient have any of these symptoms?

**Pain**  
**Acuity**  
**Light**  
**Side (Unilateral/Bilateral)**

Pain in eye  

Impaired vision  

Light hurts eyes  

If any of these symptoms are present, consider the six sight-threatening conditions:

1. Acute glaucoma
2. Corneal Abrasion/ Keratitis
3. Iritis
4. Scleritis
5. Penetrating eye injury or embedded foreign body (may not always cause red eye)
6. Acid or alkali burns

If symptoms present, **consider referral for same-day assessment by Ophthalmology.**  
Conjunctivitis should not present with symptoms above.

Wears contact lenses  

\*Contact lens wearers are more at risk of pseudomonal eye infections, which can be sight-threatening and require quinolone antibiotics. Discuss with Ophthalmology if concerned.

### Pain in eye

| Date               | Checked | ... |
|--------------------|---------|-----|
| No previous values |         |     |

Show recordings from other templates  
 Show empty recordings

Information Print Suspend Ok Cancel

Figure 6a

Acute Eye/Ophthalmology Consultation Template

Acute Eye Symptoms | Eye Examinations | Eye examinations continued

### Eye Examinations

Left Visual Acuity

Left Visual acuity improves with pinhole

Right visual acuity

Right Visual acuity improves with pinhole

Fluorescein Staining

Pupils

- Anisocoria - unequal pupil diameter (Xa8...)
- O/E - Argyll Robertson pupils (2BG3.)
- O/E - fixed, dilated pupils (22E4.)
- O/E - pinpoint pupils (22E3.)
- O/E - pupils irregular (2BG2.)
- O/E - pupils react to accommod (2BI5.)
- O/E - pupils react to light (2BI3.)

Ocular movements

### Left Visual Acuity

| Date               | Selection |
|--------------------|-----------|
| No previous values |           |

Show recordings from other templates  
 Show empty recordings

Information | Print | Suspend | Ok | Cancel

Figure 6b

Acute Eye/Ophthalmology Consultation Template

Acute Eye Symptoms | Eye Examinations | Eye examinations continued

Fundoscopy

Examination of visual fields

Other observations

*This is not an exhaustive list of acute eye examinations, in all cases use clinical judgement.*

Information | Print | Suspend | Ok | Cancel

**Left Visual Acuity**

| Date               | Selection | ... |
|--------------------|-----------|-----|
| No previous values |           |     |

Show recordings from other templates  
 Show empty recordings

Figure 6c
